# Supplementary material for: Establishment of multifactor predictive models for the occurrence and progression of cervical intraepithelial neoplasia
Source: Springer Nature journal article supplement (doi:10.1186/s12885-020-07265-7), 2020-09-29
Supplement: MOESM1 [file 18429522]

Table S1 Sequences of primers

| Gene name      | Forward sequences       | Reverse sequences       |
|----------------|-------------------------|-------------------------|
| CCND2          | ACCTTCCGCAGTGCTCCTA     | CCCAGCCAAGAAACGGTCC     |
| CTNNB1         | CATCTACACAGTTTGATGCTGCT | GCAGTTTTGTTCAGTTCAGGGA  |
| PRKCI          | GACAACGAACAGCTCTTCACC   | CCAGGACGTTCTGGTACACA    |
| PIK3CA         | AGTAGGCAACCGTGAAGAAAAG  | GAGGTGAATTGAGGTCCCTAAGA |
| FOXO1          | AAGATGACCGCTCTGACATCA   | CTTATAGACCTCAGCAAAGCGAC |
| MUC2           | AAGATGACCGCTCTGACATCA   | CTTATAGACCTCAGCAAAGCGAC |
| TGFBR2         | AAGATGACCGCTCTGACATCA   | CTTATAGACCTCAGCAAAGCGAC |
| TP73           | CGGGCCATGCCTGTTTACA     | TGTCCTTCGTTGAAGTCCCTC   |
| CSKN1A1        | AGTGGCAGTGAAGCTAGAATCT  | CGCCAATACCCATTAGGAAGTT  |
| CTBP2          | ATCCACGAGAAGGTTCTAAACGA | CCGCACGATCACTCTCAGG     |
| $\beta$ -actin | CTCCATCCTGGCCTCGCTGT    | GCTGTACCTTCACCGTTCC     |
